# Supplementary material for: Evaluation of the Feasibility of Screening Tau Radiotracers Using an Amyloid Biomathematical Screening Methodology
Source: Hindawi journal article supplement (doi:10.1155/2018/6287913), 2018-12-19
Supplement: f1 [file 6287913.f1.pdf]

Supplementary Table 1: Predicted  $K_1$ ,  $k_2$  and  $BP_{ND}$  values in HC and AD of 9 clinically-applied tau-related radiotracers.

| Clinically-applied<br>Tau Radiotracers | $K_1$<br>(mL/cm <sup>3</sup> / min) | $k_2$<br>(min <sup>-1</sup> ) | $BP_{ND}$ (Unitless) |        |
|----------------------------------------|-------------------------------------|-------------------------------|----------------------|--------|
|                                        |                                     |                               | HC                   | AD     |
| [ <sup>18</sup> F]THK523               | 0.200                               | 0.069                         | 0.035                | 0.43   |
| [ <sup>18</sup> F]THK5105              | 0.181                               | 0.067                         | 0.053                | 0.67   |
| [ <sup>18</sup> F]THK5117              | 0.202                               | 0.087                         | 0.042                | 0.53   |
| [ <sup>18</sup> F]THK5317              | 0.202                               | 0.087                         | 0.012                | 0.15   |
| [ <sup>18</sup> F]THK5351              | 0.220                               | 0.141                         | 0.10                 | 1.28   |
| [ <sup>18</sup> F]flortaucipir         | 0.256                               | 0.199                         | 0.033                | 0.42   |
| [ <sup>18</sup> F]T808                 | 0.151                               | 0.039                         | 0.0010               | 0.0017 |
| [ <sup>11</sup> C]PBB3                 | 0.226                               | 0.136                         | 0.041                | 0.51   |
| [ <sup>18</sup> F]FDDNP                | 0.209                               | 0.088                         | 0.003                | 0.036  |
